# Supplementary material for: Chitosan from Mushroom Improves Drought Stress Tolerance in Tomatoes
Source: MDPI journal article supplement (doi:10.3390/plants13071038), 2024-04-06
Supplement: s1 [file s1]

### Supplementary Materials:

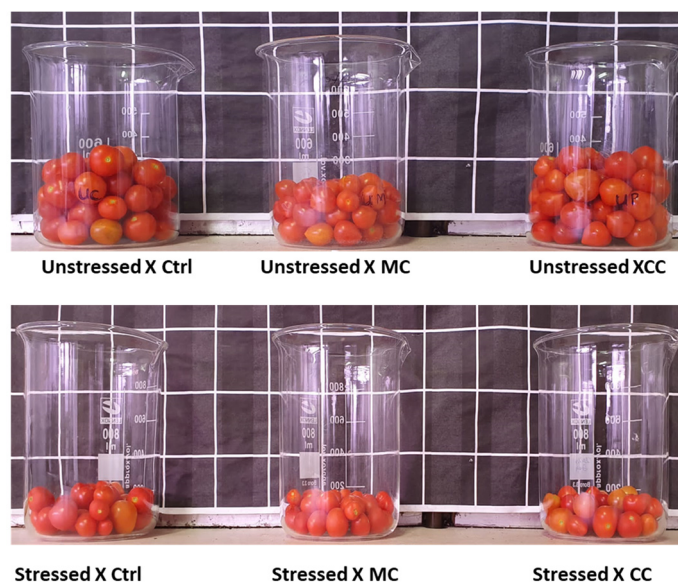

**Figure S1.** Marketable fruits at the end of drought stress trial.

**Table S1** Phenotypic and physiologic parameters and relative water content before application of chitosan and drought stress (T0)

| Treatments        | Pre-anthesis | Active flowers | Post anthesis | Fruiting | %RWC        |
|-------------------|--------------|----------------|---------------|----------|-------------|
| Unstressed x Ctrl | 7.5±2.9 a    | 0.5            | 0             | 0        | 80.22±3.5 a |
| Unstressed x MC   | 5.5±2.5 a    | 0              | 0             | 0        | 84.04±3.9 a |
| Unstressed x CC   | 5.5±1.2 a    | 0              | 0             | 0        | 83.64±4.9 a |
| Stressed x Ctrl   | 9.75±1.19 a  | 0              | 0             | 0        | 84.33±2.0 a |
| Stressed x MC     | 9.13±1.5 a   | 0              | 0             | 0        | 84.79±1.8 a |
| Stressed x CC     | 8.63±1.9 a   | 0              | 0             | 0        | 89.55±0.7 a |

Different letters within each parameter indicate statistically significant differences within the same factor (Stressed or unstressed). The analysis is based on one-way ANOVA analysis turkey HSD post hoc test. Ctrl; Control, MC; Mushroom chitosan, CC; Commercial chitosan.

**Table S2.** Biochemical parameters before application of chitosan and drought stress.

| Treatments        | Chlorophyll (µg/DW) | Carotenoids (µg/DW) | Proline (%DW) | Sucrose (mg/gDW) | MDA (nmol/mgDW) |
|-------------------|---------------------|---------------------|---------------|------------------|-----------------|
| Unstressed x Ctrl | 33.48±4.9 a         | 1.37±0.7 a          | 4.04±1.3 a    | 18.58±1.8 b      | 22.17±3.4 b     |
| Unstressed x MC   | 44.76±12.3 a        | 1.54±1.0 a          | 3.77±1.4 a    | 10.45±1.0 a      | 16.34±3.2 a     |

---

|                 |              |            |            |             |             |
|-----------------|--------------|------------|------------|-------------|-------------|
| Unstressed x CC | 44.76±12.3 a | 1.54±1.0 a | 3.77±1.4 a | 10.45±1.0 a | 16.34±3.2 a |
| Stressed x Ctrl | 33.35±3.0 a  | 1.74±0.1 a | 3.93±0.5 b | 17.55±1.1 a | 19.07±3.3 a |
| Stressed x MC   | 32.66±3.9 a  | 1.67±0.4 a | 2.13±0.4 a | 18.74±1.5 a | 22.17±3.3 a |
| Stressed x CC   | 32.66±3.9 a  | 1.67±0.4 a | 2.13±0.4 a | 18.74±1.5 a | 22.17±3.3 a |

---

Different letters within each parameter indicate statistically significant differences within the same factor (Stressed or unstressed). The analysis is based on one-way ANOVA analysis turkey HSD post hoc test. Ctrl; Control, MC; Mushroom chitosan, CC; Commercial chitosan.
